# Supplementary material for: Surface passivation with an electron-donating sulfonate group for high-performance and stable perovskite solar cells
Source: Royal Society of Chemistry journal article supplement (doi:10.1039/d4ta01039f), 2024-01-01
Supplement: d4ta01039f1.pdf [file d4ta01039f1.pdf]

## Supporting Information

# Surface passivation with an electron-donating sulfonate group for high-performance and stable perovskite solar cells

*Qingquan He, Zenan Zhang, An Chen, Tao Zhang, Xiuyuan Chen, Xiaolong Bian, Gaopeng Xu, Ting Chen, Shicheng Pan, Jiewen Yu, Guochao Lu, Jing Li, Jun Pan\**

College of Materials Science and Engineering, Zhejiang University of Technology, Hangzhou 310014, People's Republic of China

Email: [panjun0123@zjut.edu.cn](mailto:panjun0123@zjut.edu.cn)

## Experimental Section

Materials: Tin oxide (SnO<sub>2</sub>) colloidal dispersion (15% in H<sub>2</sub>O colloidal dispersion) was purchased from Alfa Aesar. Lead iodide (PbI<sub>2</sub>), cesium iodide (CsI), formamidinium iodide (FAI), methylammonium chloride (MACl), lithium bis(trifluoromethanesulfonyl)imide salt (LiTFSI), 4-tert-butylpyridine (tBP), and 2,2',7,7'-tetrakis(N,N-dimethoxyphenylamine)-9,9-spirobifluorene (spiro-OMeTAD) were purchased from Xi'an Polymer Light Technology Co., Ltd. 4-Aminophenyl sulfone (APS) was purchased from Adamas Reagent, Ltd. N, N-Dimethylformamide (DMF), dimethyl sulfoxide (DMSO), chlorobenzene (CB), acetonitrile (ACN), and isopropanol (IPA) were purchased from Sigma-Aldrich. All materials and solvents were used directly as received without further purification.

Device Fabrication: we used a two-step spin-coating method to fabricate solar cells. Firstly, SnO<sub>2</sub> colloidal dispersion was spin-coated on ITO at 4000 r.p.m. for 30 s after being treated with UV-Ozone for 15 min to eliminate organic impurities. The prepared ITO/SnO<sub>2</sub> was then annealed at 150 °C for 30 min. Subsequently, a 50 μL PbI<sub>2</sub> solution, prepared by dissolving 691.5 mg PbI<sub>2</sub> and 18 mg CsI in a mixed solvent of DMF and DMSO (volume 9:1), was spin-coated on the SnO<sub>2</sub> layer at 1500 r.p.m. for 30 s, followed by annealing at 70 °C for 1 min. After cooling, 120 μL of FAI Solution, created by dissolving 90 mg FAI and 9 mg MACl in 1 mL IPA, was deposited in the PbI<sub>2</sub> layer quickly and annealed at 150 °C for 15 min under ambient air conditions (RH 30%). It should be emphasized that humidity played a key role in the quality of the perovskite film. Following perovskite formation, the film was transferred to a nitrogen-filled glove box for further processing. For APS modification, an APS solution with a concentration of 3 mg/mL in IPA was spin-coated onto the perovskite surface at 5000 r.p.m. for 30 s and then annealed at 100 °C for 5 min. Subsequently, a 60 μL Spiro solution, comprising 72.3 mg Spiro, 17.5 μL LiTFSI and 28.8 μL tBP in 1 mL CB was spin-coated on top of the APS layer at 3200 r.p.m. for 30 s. Finally, a 100 nm thick Ag film was thermally evaporated as a counter electrode using a shadow mask. After device preparation, it was oxidized in a drying cabinet for several days.

## Characterizations

The chemical state of the elements was recorded on X-ray photoelectron spectra (XPS, Thermo Scientific K-Alpha, Al-Ka.1486.6 eV). Fourier transform infrared (FTIR) spectra are recorded by Thermo Scientific (NICOLET6700). X-ray diffraction

(XRD) patterns were collected with an X-ray diffractometer using Cu-K $\alpha$  radiation ( $\lambda=0.154187$  nm). The surface morphology of the perovskite films was characterized by scanning electron microscopy (SEM, Nova NanoSEM450) and atomic force microscopy (AFM, Bruker Dimension). The contact angles are measured by dropping a drop of ultrapure water on the surface of the perovskite films using a contact angle measuring instrument (OAC30, Shanghai JMH Science & Technology Co., Ltd.). Ultraviolet photoelectron spectroscopy (Thermo Fisher EscaLab 250Xi) and UV-vis absorption spectroscopy (Shimadzu, UV-2600i) were measured to analyze the band structure of the perovskite films. Excitation-emission-matrix (EEM) spectra are recorded by Duetta-HORIBA. Time-resolved photoluminescence (TRPL) spectra are recorded by Omni 990 (Zolix). The electrochemical impedance spectroscopy (EIS) measurement was carried out on a Zahner Zennium electrochemical workstation in the frequency range from 1 MHz–0.1 Hz. J-V curves of the perovskite solar cells were measured by using the solar simulator (AM 1.5G, Zolix, Sirius-SS150A) and calibrated using standard silicon solar cells. The external quantum efficiency (EOE) data were obtained using the solar cell spectral response measurement system (RE-R, Enlitech). Perovskite devices and films were tested humidity stability in a seal dark environment with a relative humidity of 30% (room temperature) for humidity aging. Perovskite devices and films were continuously heated at 70 °C in N<sub>2</sub> and relatively dry sealed atmosphere for testing the thermal stability.

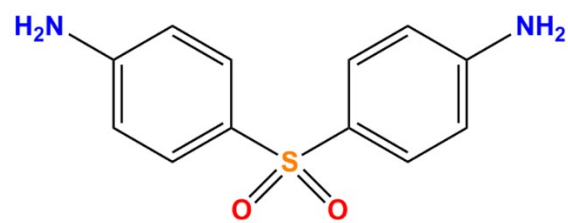

**Fig. S1** The chemical structure of APS.

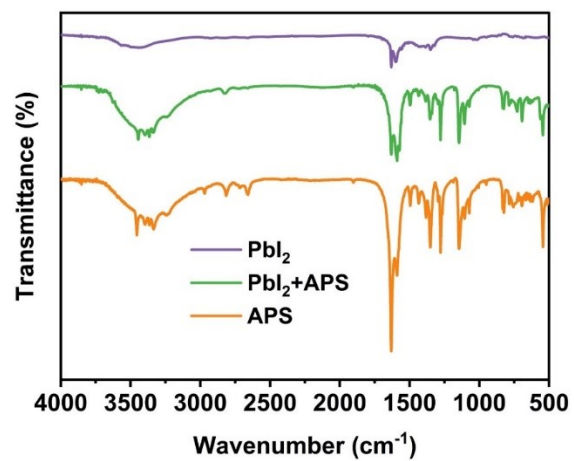

**Fig. S2** The FTIR spectra of PbI<sub>2</sub>, APS, and APS with PbI<sub>2</sub>.

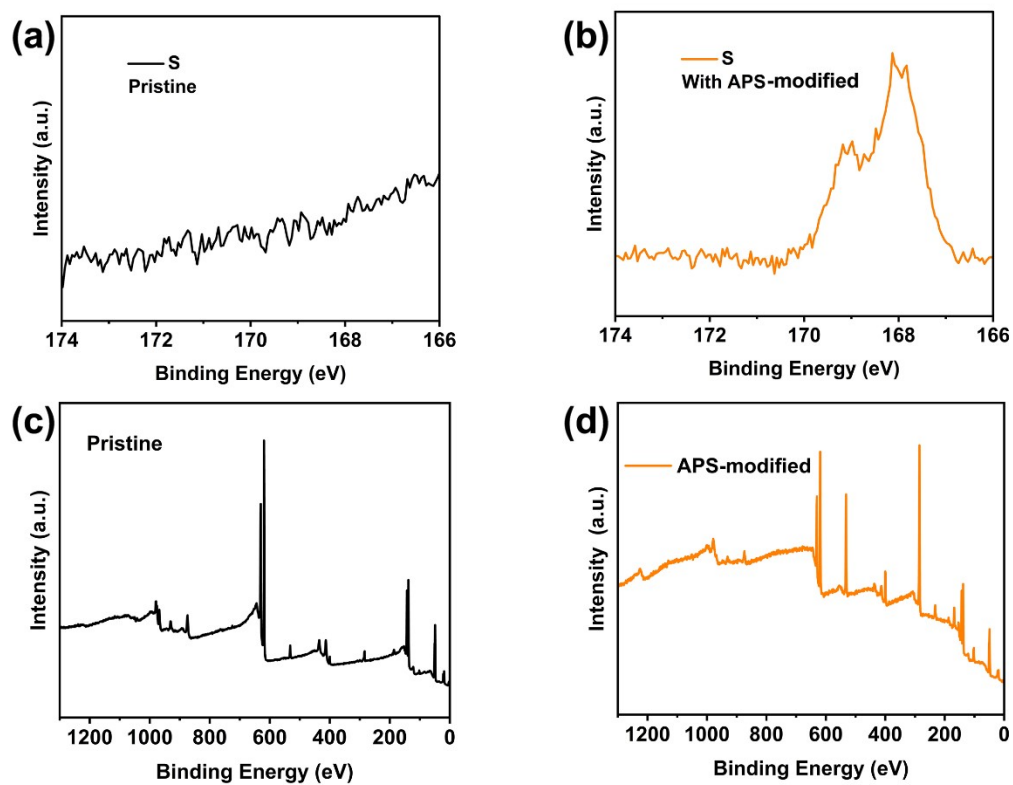

**Fig. S3** XPS spectra of the (a, b) S atom core level and (c, d) survey of perovskite films with/without APS modification.

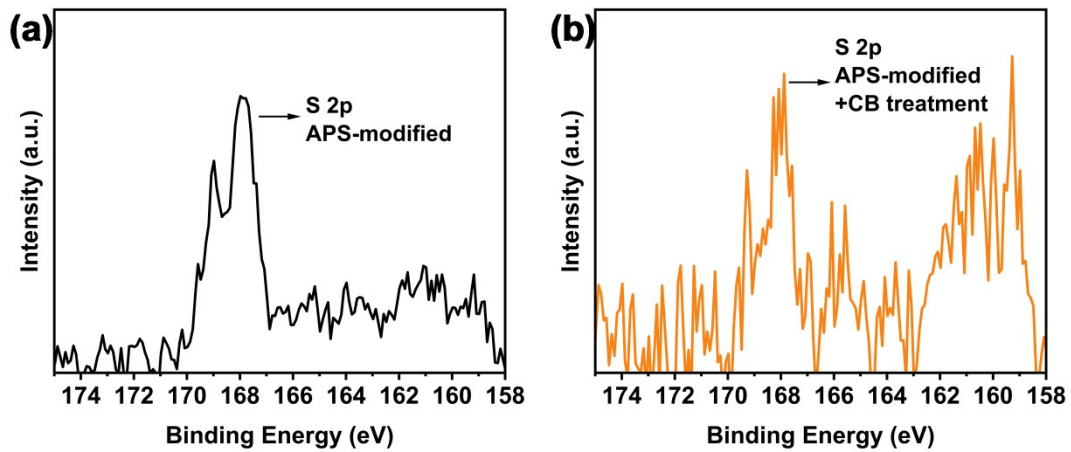

**Fig. S4** XPS spectra of S 2p for perovskite films with (a) APS modification, (b) CB treatment after APS modification.

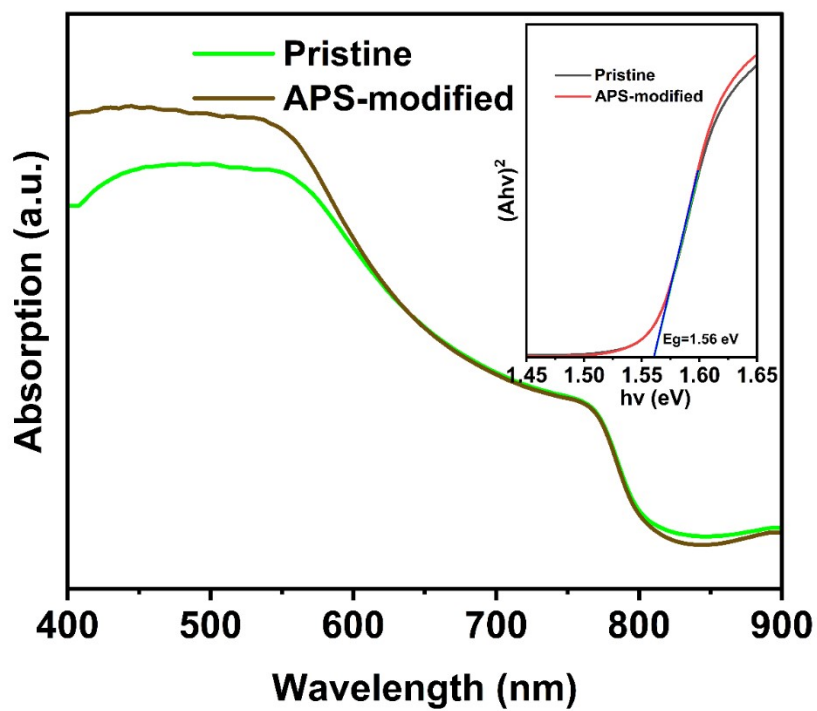

**Fig. S5** UV-vis absorption spectra of pristine and APS-modified perovskite films.



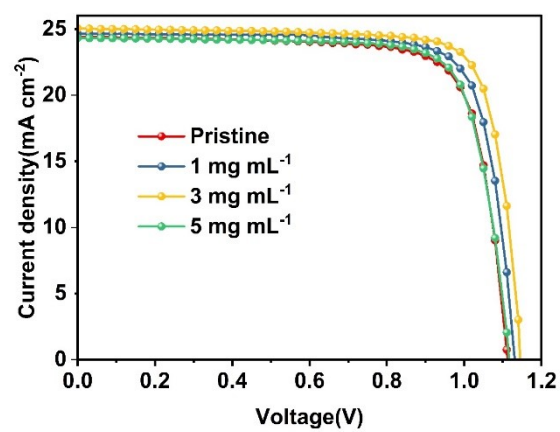

**Fig. S6** The J-V curves of the champion devices based on perovskite films modified with different APS concentrations.

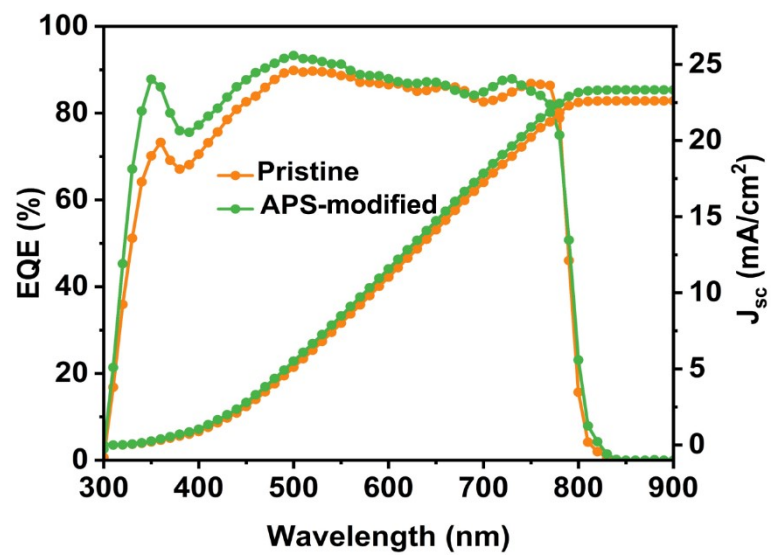

**Fig. S7** EQE and the corresponding integrated  $J_{SC}$  curves of PSCs.

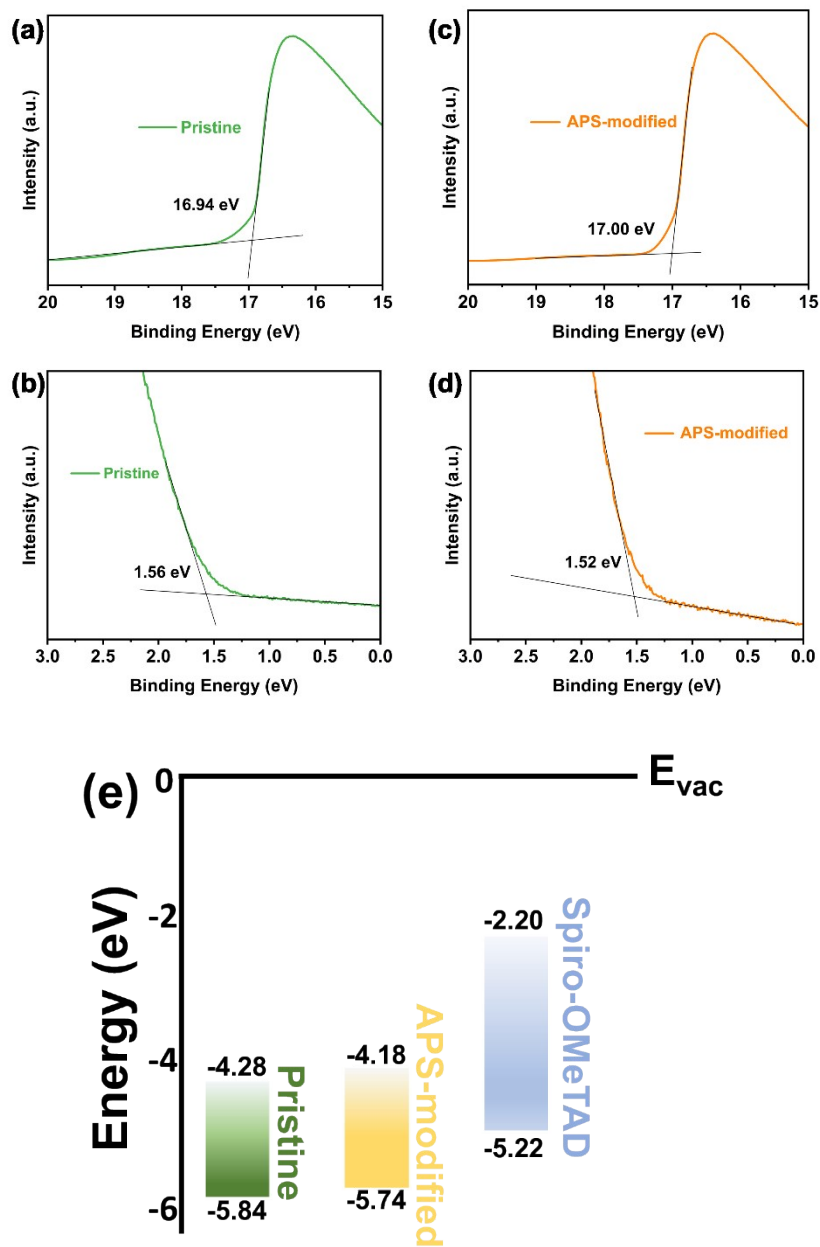

**Fig. S8** UPS spectra and energy level diagrams of pristine and APS-modified perovskite films.

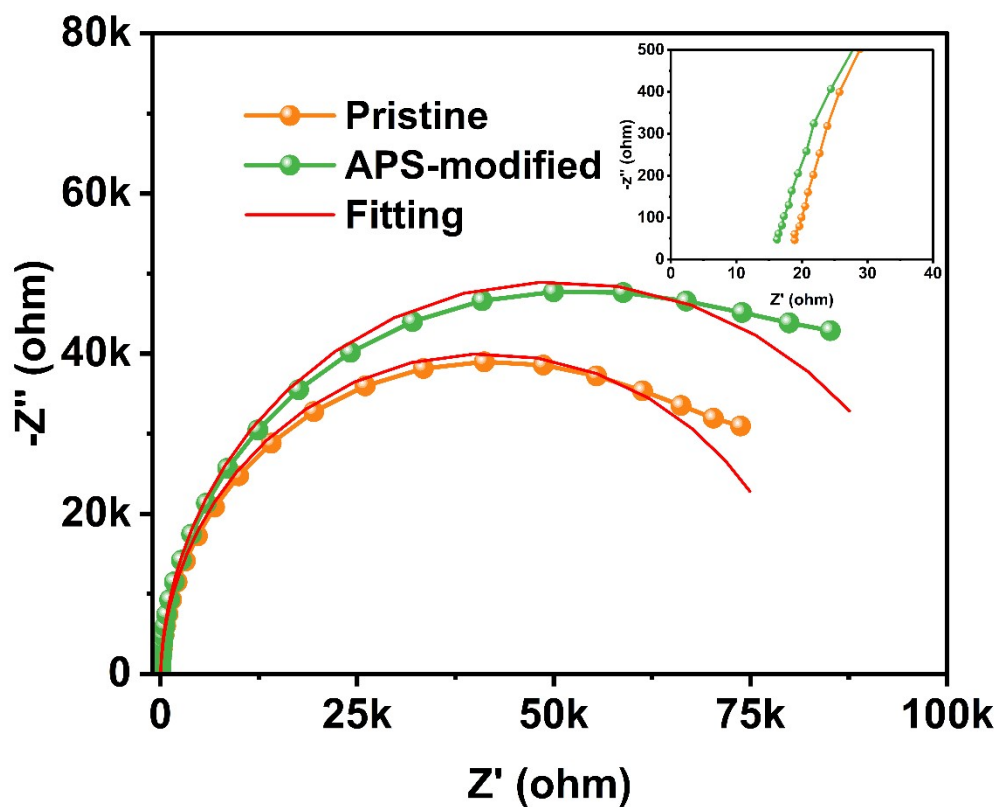

**Fig. S9** Nyquist plots of PSCs based on pristine and APS-modified perovskite films under dark conditions. Inset: The equivalent circuit model used for fitting the Nyquist plots of the devices. EIS was conducted in dark and atmospheric environments with a 0.5 V bias voltage.

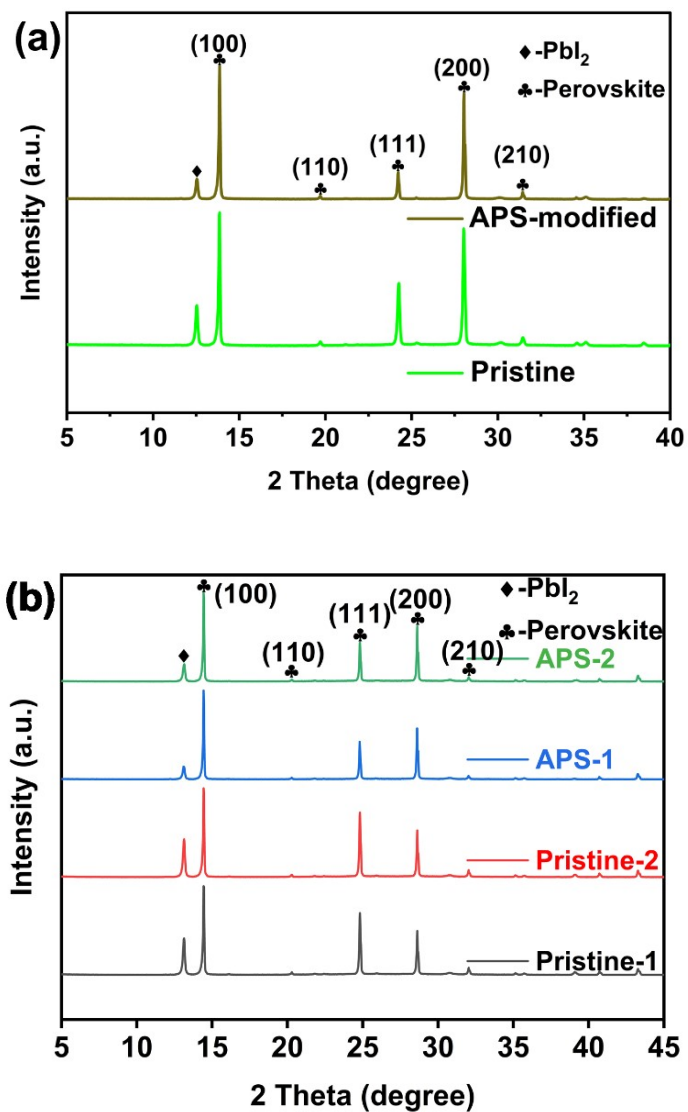

**Fig. S10** (a) XRD patterns with long-term stability measurement of pristine and APS-modified perovskite films. (b) XRD patterns of the pristine and APS-modified perovskite films with multiple samples.

**Table S1.** The fitted results of TRPL for pristine and APS-modified perovskite films

| Sample       | $A_1$ (%) | $\tau_1$ (ns) | $A_2$ (%) | $\tau_2$ (ns) | $\tau_{avg}$ (ns) |
|--------------|-----------|---------------|-----------|---------------|-------------------|
| Pristine     | 23.70     | 105.65        | 73.46     | 556.39        | 530.37            |
| APS-modified | 28.42     | 192.40        | 65.93     | 1149.91       | 1085.49           |

The TRPL lifetime was obtained by fitting the TRPL spectra measured from the perovskite films with a biexponential decay function:

$$I(t) = A_1 \exp\left(-\frac{t}{\tau_1}\right) + A_2 \exp\left(-\frac{t}{\tau_2}\right) + A_0$$

where  $A_1$  and  $A_2$  are the decay amplitude,  $\tau_1$  and  $\tau_2$  are the decay time and  $A_0$  is the decay constant. The average PL decay times ( $\tau_{avg}$ ) are further estimated using the following expression:<sup>[2]</sup>

$$\tau_{avg} = \frac{A_1 \tau_1^2 + A_2 \tau_2^2}{A_1 \tau_1 + A_2 \tau_2}$$

**Table S2** Photovoltaic parameters of PSCs modified with different APS concentrations

| Sample                | $J_{SC}$ ( $\text{mA}\cdot\text{cm}^{-2}$ ) | $V_{OC}$ (V) | FF (%) | PCE (%) |
|-----------------------|---------------------------------------------|--------------|--------|---------|
| 0 $\text{mg mL}^{-1}$ | 24.49                                       | 1.111        | 78.14  | 21.26   |
| 1 $\text{mg mL}^{-1}$ | 24.64                                       | 1.131        | 78.98  | 22.01   |
| 3 $\text{mg mL}^{-1}$ | 25.05                                       | 1.145        | 80.29  | 23.03   |
| 5 $\text{mg mL}^{-1}$ | 24.31                                       | 1.116        | 78.11  | 21.20   |

**Table S3** Photovoltaic parameters of champion PSCs with/without APS modification

| Sample       | Scan direction | $J_{sc}$<br>( $\text{mA}\cdot\text{cm}^{-2}$ ) | $V_{oc}$ (V) | FF (%) | PCE (%) |
|--------------|----------------|------------------------------------------------|--------------|--------|---------|
| Pristine     | Reverse        | 24.49                                          | 1.111        | 78.14  | 21.26   |
|              | Forward        | 23.99                                          | 1.079        | 72.77  | 18.83   |
| APS-modified | Reverse        | 25.05                                          | 1.145        | 80.29  | 23.03   |
|              | Forward        | 24.83                                          | 1.120        | 76.31  | 21.22   |

## References

- [1] C.-L. Mai, Q. Xiong, X. Li, J.-Y. Chen, J.-Y. Chen, C.-C. Chen, J. Xu, C. Liu, C.-Y. Yeh and P. Gao, *Angew. Chem. Int. Ed.*, 2022, 61, e202209365.
- [2] W. Wang, K. Wei, L. Yang, J. Deng, J. Zhang and W. Tang, *Mater. Horiz.*, 2023, 10, 2609-2617.
